# Supplementary material for: APEX1 Expression as a Potential Diagnostic Biomarker of Clear Cell Renal Cell Carcinoma and Hepatobiliary Carcinomas
Source: PubMed Central journal article supplement (PMC6723795; doi:10.3390/jcm8081151), 2019-08-01
Supplement: jcm-08-01151-s001.pdf [file jcm-08-01151-s001.pdf]

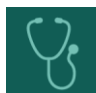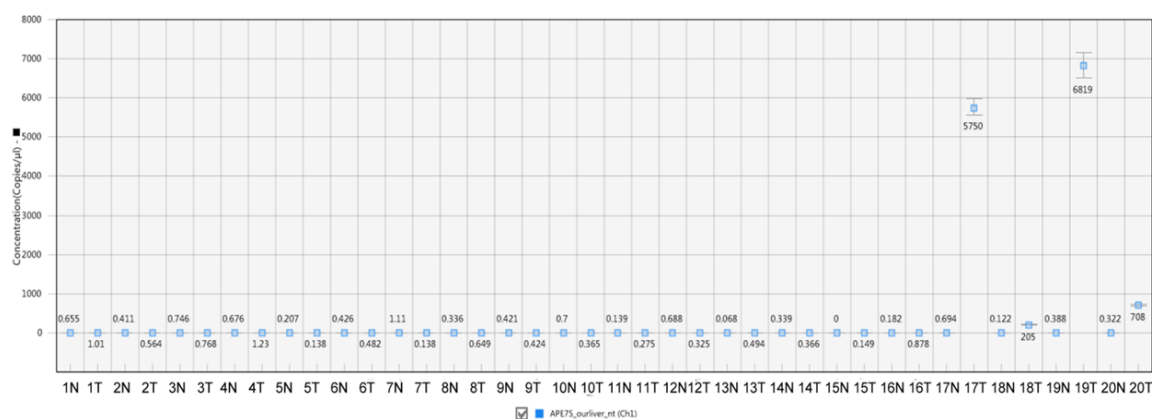

**Figure S1.** APEX1 mRNA expression levels in 20 cases of hepatocellular carcinoma (HCC). Analysis of APEX1 mRNA expression level by reverse transcriptase digital droplet PCR (RT-ddPCR) ( $p = 0.048$ , Wilcoxon signed-rank test).

**Table S1.** Univariate analysis of overall survival and disease-free survival in 131 patients with primary HCC.

| Prognostic Factor                     | Overall Survival    |       | Disease-Free Survival |       |
|---------------------------------------|---------------------|-------|-----------------------|-------|
|                                       | HR (95% CI)         | $p^*$ | HR (95% CI)           | $p^*$ |
| Nuclear APEX1                         | 1.117 (0.862–1.448) | 0.404 | 0.996 (0.859–1.155)   | 0.959 |
| Cytoplasmic APEX1                     | 1.061 (0.906–1.244) | 0.462 | 1.126 (1.012–1.251)   | 0.029 |
| Age at operation                      |                     | 0.220 |                       | 0.815 |
| ≤65                                   | 1 (reference)       |       | 1 (reference)         |       |
| >65                                   | 0.476 (0.145–1.558) |       | 0.931 (0.513–1.691)   |       |
| Sex                                   |                     | 0.567 |                       | 0.987 |
| Male                                  | 1 (reference)       |       | 1 (reference)         |       |
| Female                                | 0.757 (0.291–1.968) |       | 0.995 (0.564–1.755)   |       |
| HBV infection                         |                     | 0.910 |                       | 0.571 |
| No                                    | 1 (reference)       |       | 1 (reference)         |       |
| Yes                                   | 1.049 (0.458–2.403) |       | 1.177 (0.669–2.070)   |       |
| Cirrhosis                             |                     | 0.883 |                       | 0.160 |
| No                                    | 1 (reference)       |       | 1 (reference)         |       |
| Yes                                   | 0.945 (0.443–2.017) |       | 1.475 (0.858–2.537)   |       |
| Tumor size<br>(the greatest diameter) |                     | 0.004 |                       | 0.037 |
| ≤5.0 cm                               | 1 (reference)       |       | 1 (reference)         |       |
| >5.0 cm                               | 3.254 (1.448–7.317) |       | 1.893 (1.039–3.451)   |       |
| Lymphovascular invasion               |                     | 0.743 |                       | 0.029 |
| No                                    | 1 (reference)       |       | 1 (reference)         |       |
| Yes                                   | 0.874 (0.393–1.948) |       | 2.050 (1.078–3.899)   |       |
| Histologic grade                      |                     | 0.002 |                       | 0.001 |
| 1–2 (well and moderate)               | 1 (reference)       |       | 1 (reference)         |       |
| 3–4 (poorly and undiff.)              | 3.252 (1.550–6.823) |       | 2.440 (1.414–4.208)   |       |
| Pathologic stage                      |                     | 0.392 |                       | 0.018 |
| I                                     | 1 (reference)       |       | 1 (reference)         |       |
| II–IV                                 | 1.367 (0.668–2.795) |       | 1.832 (1.108–3.027)   |       |

\* Univariate Cox regression analysis; HR, hazard ratio; CI, confidence interval; HBV, hepatitis B viral infection; nuclear APEX1, nuclear expression of APEX1 protein in cancer cells; and cytoplasmic APEX1, cytoplasmic expression of APEX1 protein in cancer cells.

**Table S2.** Univariate analysis of overall survival and disease-free survival in 32 patients with primary intrahepatic cholangiocarcinoma.

| Prognostic Factor | Overall Survival | Disease-Free Survival |
|-------------------|------------------|-----------------------|
|-------------------|------------------|-----------------------|

|                        | HR (95% CI)         | <i>p</i> * | HR (95% CI)         | <i>p</i> * |
|------------------------|---------------------|------------|---------------------|------------|
| Nuclear APEX1          | 0.841 (0.686–1.031) | 0.095      | 0.979 (0.842–1.138) | 0.781      |
| Cytoplasmic APEX1      | 1.325 (0.915–1.919) | 0.137      | 1.288 (1.033–1.605) | 0.024      |
| Age at operation       |                     | 0.340      |                     | 0.873      |
| ≤65                    | 1 (reference)       |            | 1 (reference)       |            |
| >65                    | 0.362 (0.045–2.909) |            | 1.076 (0.437–2.649) |            |
| Sex                    |                     | 0.491      |                     | 0.784      |
| Male                   | 1 (reference)       |            | 1 (reference)       |            |
| Female                 | 0.577 (0.120–2.759) |            | 0.869 (0.320–2.362) |            |
| HBV infection          |                     | 0.796      |                     | 0.463      |
| No                     | 1 (reference)       |            | 1 (reference)       |            |
| Yes                    | 0.813 (0.168–3.920) |            | 0.683 (0.247–1.889) |            |
| Cirrhosis              |                     | 0.980      |                     | 0.955      |
| No                     | 1 (reference)       |            | 1 (reference)       |            |
| Yes                    | 0.980 (0.198–4.854) |            | 0.969 (0.326–2.883) |            |
| Histologic grade       |                     | 0.409      |                     | 0.702      |
| 1–2 (well & moderate)  | 1 (reference)       |            | 1 (reference)       |            |
| 3–4 (poorly & undiff.) | 0.416 (0.052–3.332) |            | 0.808 (0.272–2.404) |            |
| Pathologic stage       |                     | 0.679      |                     | 0.907      |
| I                      | 1 (reference)       |            | 1 (reference)       |            |
| II–IV                  | 0.644 (0.080–5.176) |            | 1.092 (0.249–4.790) |            |

\* Univariate Cox regression analysis; HR, hazard ratio; CI, confidence interval; HBV, hepatitis B viral infection; nuclear APEX1, nuclear expression of APEX1 protein in cancer cells; and cytoplasmic APEX1, cytoplasmic expression of APEX1 protein in cancer cells.

**Table S3.** Univariate analysis of overall survival and disease-free survival in 106 patients with clear cell renal cell carcinoma.

| Prognostic Factor | Overall Survival     |            | Disease-Free Survival |            |
|-------------------|----------------------|------------|-----------------------|------------|
|                   | HR (95% CI)          | <i>p</i> * | HR (95% CI)           | <i>p</i> * |
| Nuclear APEX1     | 1.081 (0.769–1.519)  | 0.654      | 0.989 (0.733–1.333)   | 0.940      |
| Cytoplasmic APEX1 | 1.038 (0.841–1.281)  | 0.729      | 1.026 (0.822–1.281)   | 0.818      |
| Age at operation  |                      | 0.110      |                       | 0.725      |
| ≤65               | 1 (reference)        |            | 1 (reference)         |            |
| >65               | 2.405 (0.819–7.066)  |            | 1.208 (0.422–3.458)   |            |
| Sex               |                      | 0.386      |                       | 0.889      |
| Male              | 1 (reference)        |            | 1 (reference)         |            |
| Female            | 0.571 (0.161–2.024)  |            | 1.086 (0.340–3.466)   |            |
| Nuclear grade     |                      | 0.027      |                       | 0.739      |
| I–II              | 1 (reference)        |            | 1 (reference)         |            |
| III–IV            | 3.223 (1.145–9.072)  |            | 1.205 (0.403–3.600)   |            |
| Pathologic stage  |                      | 0.066      |                       | 0.075      |
| I                 | 1 (reference)        |            | 1 (reference)         |            |
| II–IV             | 3.290 (0.925–11.701) |            | 3.207 (0.890–11.556)  |            |

\* Univariate Cox regression analysis; HR, hazard ratio; CI, confidence interval.

**Table S4.** Multivariate analysis of overall survival and disease-free survival in 106 patients with clear cell renal cell carcinoma.

| Prognostic Factor | Overall Survival    |            | Disease-Free Survival |            |
|-------------------|---------------------|------------|-----------------------|------------|
|                   | HR (95% CI)         | <i>p</i> * | HR (95% CI)           | <i>p</i> * |
| Nuclear APEX1     | 1.288 (0.901–1.841) | 0.165      | 1.086 (0.784–1.505)   | 0.619      |
| Cytoplasmic APEX1 | 0.899 (0.696–1.162) | 0.417      | 1.042 (0.774–1.404)   | 0.785      |
| Age at operation  |                     | 0.254      |                       | 0.766      |
| ≤65               | 1 (reference)       |            | 1 (reference)         |            |
| >65               | 1.916 (0.627–5.850) |            | 1.177 (0.403–3.438)   |            |
| Sex               |                     | 0.105      |                       | 0.651      |
| Male              | 1 (reference)       |            | 1 (reference)         |            |

|                  |                      |                      |       |
|------------------|----------------------|----------------------|-------|
| Female           | 0.324 (0.083–1.264)  | 0.754 (0.222–2.557)  |       |
| Nuclear grade    |                      | 0.003                | 0.725 |
| I–II             | 1 (reference)        | 1 (reference)        |       |
| III–IV           | 7.670 (2.022–29.088) | 1.303 (0.299–5.682)  |       |
| Pathologic stage |                      | 0.011                | 0.059 |
| I                | 1 (reference)        | 1 (reference)        |       |
| II–IV            | 6.262 (1.527–25.672) | 3.607 (0.955–13.629) |       |

\* Multivariate Cox regression analysis; HR, hazard ratio; CI, confidence interval.

**Table S5.** Correlations among the serum levels of APEX1, AST, ALT, GGT, and CRP by ELISA, and HBV DNA status.

| Spearman’s Rho |                         | APEX1    | AST      | ALT      | GGT      | CRP      | HBV DNA (+) |
|----------------|-------------------------|----------|----------|----------|----------|----------|-------------|
| APEX1          | Correlation coefficient | 1.000    | 0.146 *  | 0.131    | 0.212 ** | 0.291 ** | 0.258 *     |
|                | Sig. (2-tailed)         | .        | 0.034    | 0.057    | 0.006    | 0.002    | 0.038       |
|                | No.                     | 216      | 211      | 211      | 168      | 108      | 65          |
| AST            | Correlation coefficient | 0.146 *  | 1.000    | 0.750 ** | 0.668 ** | −0.129   | −0.039      |
|                | Sig. (2-tailed)         | 0.034    | .        | 0.000    | 0.000    | 0.184    | 0.755       |
|                | No.                     | 211      | 211      | 211      | 168      | 108      | 65          |
| ALT            | Correlation coefficient | 0.131    | 0.750 ** | 1.000    | 0.517 ** | −0.178   | 0.046       |
|                | Sig. (2-tailed)         | 0.057    | 0.000    | .        | 0.000    | 0.065    | 0.716       |
|                | No.                     | 211      | 211      | 211      | 168      | 108      | 65          |
| GGT            | Correlation coefficient | 0.212 ** | 0.668 ** | 0.517 ** | 1.000    | 0.371 ** | −0.063      |
|                | Sig. (2-tailed)         | 0.006    | 0.000    | 0.000    | .        | 0.001    | 0.629       |
|                | No.                     | 168      | 168      | 168      | 168      | 74       | 62          |
| CRP            | Correlation coefficient | 0.291 ** | −0.129   | −0.178   | 0.371 ** | 1.000    | −0.239      |
|                | Sig. (2-tailed)         | 0.002    | 0.184    | 0.065    | 0.001    | .        | 0.355       |
|                | No.                     | 108      | 108      | 108      | 74       | 108      | 17          |
| HBV DNA (+)    | Correlation coefficient | 0.258 *  | −0.039   | 0.046    | −0.063   | −0.239   | 1.000       |
|                | Sig. (2-tailed)         | 0.038    | 0.755    | 0.716    | 0.629    | 0.355    | .           |
|                | No.                     | 65       | 65       | 65       | 62       | 17       | 65          |

HBV DNA (+), Hepatitis B virus DNA ≥ 58 copies/mL; \*  $p < 0.05$ ; \*\*  $p < 0.01$ .
